# Supplementary material
Source: publisher figshare collection journal article supplement (https://tandf.figshare.com/ndownloader/files/22964765)
Supplement: Supplementary file 1 [file 22964765]

## **Supplemental Material: Systematic Review of Published Meta-Analyses of Vaccine Safety**

Rositsa B. Dimova<sup>a\*</sup>, Christopher C. Egelebo<sup>a</sup>, and Hector S. Izurieta<sup>a</sup>

<sup>a</sup> *U. S. Food and Drug Administration, Silver Spring, MD, United States*

\* Corresponding Author: email: [Rositsa.Dimova@fda.hhs.gov](mailto:Rositsa.Dimova@fda.hhs.gov);

Address for correspondence: U.S. Food and Drug Administration; 10903 New Hampshire Ave;  
Bldg. 71/1235; Silver Spring, MD 20993.

# Systematic Review of Published Meta-Analyses of Vaccine Safety

## Supplemental Material

S1. Data extracted from the publications.

The following variables were extracted from the papers and were recorded in an excel spreadsheet.

Table S1. Data extracted from the publications.

| <b>Variable</b>     | <b>Description</b>                                                                        |
|---------------------|-------------------------------------------------------------------------------------------|
| <b>ID</b>           | Unique identification number                                                              |
| <b>Author</b>       | First author's last name                                                                  |
| <b>YearPubl</b>     | Year of publication                                                                       |
| <b>Citation</b>     | Article citation                                                                          |
| <b>MASafety</b>     | Was Meta-analysis of Safety conducted?                                                    |
| <b>SystRevSaf</b>   | Was Systematic Review of Safety conducted?                                                |
| <b>Included</b>     | Does the study satisfy the inclusion criteria?                                            |
| <b>RCTonly</b>      | Does the Meta-analysis include only RCT?                                                  |
| <b>NonRCTIncl</b>   | Were non-RCT studies, such as observational studies, included?                            |
| <b>IPDMA</b>        | Is the Meta-analysis Individual Participant Data (IPD) Meta-analysis?                     |
| <b>Vaccine</b>      | Vaccine (descriptive) that was studied                                                    |
| <b>VaccineClass</b> | Vaccine (brief) class. E.g. Influenza, HPV, etc.                                          |
| <b>Control</b>      | What was the control group (if any) in the studies included in the Meta-analysis /review? |

|                       |                                                                                                 |
|-----------------------|-------------------------------------------------------------------------------------------------|
| <b>PopulDesc</b>      | Description of the population                                                                   |
| <b>PopulAge</b>       | Population age                                                                                  |
| <b>SafetyOutcomes</b> | List of the safety outcomes that were evaluated                                                 |
| <b>AIIAE</b>          | Was "Any AEs" a safety endpoint that was analyzed/reviewed?                                     |
| <b>AIISAE</b>         | Was "Any SAEs" a safety endpoint that was analyzed/reviewed?                                    |
| <b>Reactogenicity</b> | Was Reactogenicity analyzed/reviewed in the publication?                                        |
| <b>UnsolicitedAE</b>  | Were Unsolicited AEs analyzed/reviewed in the publication?                                      |
| <b>SpecificAE</b>     | Was a specific AE, such as Guillain-Barré syndrome (GBS), abortion, etc. analyzed/reviewed?     |
| <b>NInclStud</b>      | Number of studies that were included in the Meta-analysis /Systematic review                    |
| <b>MAMethod</b>       | Meta-analysis method(s) that was/were used                                                      |
| <b>RandomEffects</b>  | Was the Random effects method for Meta-analysis used?                                           |
| <b>FixedEffects</b>   | Was the Fixed effects method for Meta-analysis used?                                            |
| <b>OtherMethods</b>   | Other (than random or fixed effects Meta-analysis) methods that were used                       |
| <b>Heterogen</b>      | Was heterogeneity assessed?                                                                     |
| <b>EffectType</b>     | How was the effect defined?                                                                     |
| <b>ReasonNoMA</b>     | For publications that are not included, what is the reason(s) for not conducting Meta-analysis? |

|                |                                                                                      |
|----------------|--------------------------------------------------------------------------------------|
| <b>Concern</b> | Was a safety concern (such as significant SAE) concluded?                            |
| <b>Quality</b> | What method was used (if any) for assessment of the quality of the included studies? |

Abbreviations: AE – Adverse Events; SAE – Serious Adverse Events;

## S2. Included Publications Characteristics

Table S2. Select characteristics for each included publication.

| Publication                | RCTs<br>only<br>included | Vaccine                                           | Population                                                       | Safety<br>Outcomes                                               | N Incl.<br>Studies | Meta-<br>Analysis<br>Method                  |
|----------------------------|--------------------------|---------------------------------------------------|------------------------------------------------------------------|------------------------------------------------------------------|--------------------|----------------------------------------------|
| Vadlamudi<br>et al. (2019) | Yes                      | PCV13                                             | Adults age>50                                                    | local AEs;<br>systemic AEs;<br>all cause<br>mortality            | 5                  | random<br>effects                            |
| Arbyn et al.<br>(2018)     | Yes                      | HPV; HPV2;<br>HPV4                                | Young women<br>(ages 15-26) or<br>mid-adult<br>(ages 24-45)      | local AEs;<br>systemic; SAE;<br>deaths;<br>pregnancy<br>outcomes | 26                 | random<br>effects                            |
| Badurdeen<br>et al. (2019) | No                       | BCG vaccine<br>(given <=7<br>days after<br>birth) | Infants who<br>Are preterm<br>and/or have<br>low birth<br>weight | local AEs;<br>systemic AEs;<br>mortality                         | 7                  | random<br>effects (<br>Mantel-<br>Haenszel*) |
| Genovese<br>et al. (2018)  | No                       | HPV2; HPV4                                        | Children;<br>Adults (ages 9-<br>26)                              | Autoimmune<br>diseases                                           | 6                  | random<br>effects;<br>fixed<br>effects       |
| Tricco et al.<br>(2018)    | Yes                      | herpes zoster<br>live<br>attenuated<br>vaccine    | Adults<br>(age>50)                                               | local AEs;<br>systemic AEs;<br>SAE;<br>withdrawal as a           | 11                 | Bayesian<br>MA;<br>Network<br>MA;            |

|                          |     |                                                                    |                                         |                                                                                                                    |    |                                                   |
|--------------------------|-----|--------------------------------------------------------------------|-----------------------------------------|--------------------------------------------------------------------------------------------------------------------|----|---------------------------------------------------|
|                          |     |                                                                    |                                         | result of AE;<br>pIMD; deaths                                                                                      |    | random<br>effects                                 |
| Zheng et al.<br>(2018)   | Yes | Adjuvanted<br>H7N9<br>influenza<br>vaccines                        | Healthy Adults<br>(≥18)                 | local AEs;<br>systemic AEs                                                                                         | 6  | Mantel-<br>Haenszel<br>fixed<br>effects           |
| Baay et al.<br>(2018)    | Yes | vaccines using<br>the adjuvants<br>AS01, AS02,<br>AS03, or<br>MF59 | Adults<br>(age>50)                      | local AEs;<br>systemic AEs;<br>SAE; unsolicited<br>AE; pIMD;<br>deaths                                             | 24 | random<br>effects                                 |
| Mouchet et<br>al. (2018) | No  | HPV                                                                | Children;<br>Adults                     | central<br>demyelination;<br>multiple<br>sclerosis, optic<br>neuritis or GBS                                       | 10 | inverse<br>variance<br>random<br>effects<br>model |
| Mulley et<br>al. (2018)  | No  | All vaccines<br>against<br>infectious<br>pathogens                 | Solid-organ<br>transplant<br>recipients | de novo donor-<br>specific anti-<br>human<br>leukocyte<br>antibodies;<br>allograft<br>rejection;<br>allograft loss | 9  | random<br>effects                                 |
| Yin et al.<br>(2018)     | No  | 2-dose<br>varicella<br>vaccine/MMR<br>V                            | Healthy<br>children                     | local AEs;<br>systemic AEs                                                                                         | 6  | random<br>effects;<br>Mantel-<br>Haenszel         |

|                         |     |                                                                                                    |                       |                                                                            |    |                                                                   |
|-------------------------|-----|----------------------------------------------------------------------------------------------------|-----------------------|----------------------------------------------------------------------------|----|-------------------------------------------------------------------|
|                         |     |                                                                                                    |                       |                                                                            |    | fixed effects                                                     |
| Flacco et al. (2018)    | Yes | multicomponent meningococcal serogroup B vaccine (4CMenB)                                          | Children; Adolescents | local AEs, systemic AEs, mild-to-moderate AEs, SAE                         | 16 | random effects; individual data random effect logistic regression |
| Xu et al. (2018)        | Yes | Staphylococcus aureus vaccines (S. aureus four-antigen (SA4Ag) and three-antigen (SA3Ag) vaccines) | Adults                | local AEs; systemic AEs; severe local reactions; severe systemic reactions | 3  | fixed effects; random effects                                     |
| Malisheni et al. (2017) | Yes | Live Attenuated Tetravalent Dengue vaccine (CYD-TDV)                                               | Children              | Immediate AEs; SAE; local AEs; systemic AEs; unsolicited AEs               | 7  | random effects; fixed effects                                     |
| Costa et al. (2017)     | Yes | HPV9 vaccine                                                                                       | Women                 | local AEs; systemic AEs                                                    | 3  | fixed effects;                                                    |

|                         |     |                                             |                                        |                                               |   |                                                  |
|-------------------------|-----|---------------------------------------------|----------------------------------------|-----------------------------------------------|---|--------------------------------------------------|
|                         |     |                                             |                                        |                                               |   | random effects                                   |
| Ogawa et al. (2017)     | Yes | HPV vaccine (2vHPV, 4vHPV or 9vHPV)         | Women                                  | local AEs; systemic AEs; Unsolicited symptoms | 9 | random effects (Mantel-Haenszel*)                |
| Teo et al. (2017)       | Yes | oral whole-cell mono-bacterial NTHi vaccine | Adults with COPD or chronic bronchitis | AEs; death                                    | 5 | fixed effects; random effects (Mantel-Haenszel*) |
| Badawi et al. (2017)    | Yes | Lyme disease vaccine                        | Adults                                 | local AEs; Systemic AEs                       | 7 | random effects                                   |
| Zhao et al. (2017)      | Yes | Outer surface protein A (OspA) vaccine      | All                                    | local AEs; Systemic AEs                       | 3 | fixed effects; random effects                    |
| Velazquez et al. (2017) | Yes | RV5 (RotaTeq); RV1 (Rotarix)                | Infants in Latin American countries    | SAEs; death; intussusception                  | 3 | fixed effects (Mantel-Haenszel); random effects  |
| Godoi et al. (2017)     | Yes | dengue vaccine (Dengvaxia)                  | All in dengue endemic regions          | local AEs; Systemic AEs; SAEs                 | 9 | random effects                                   |



|                        |     |                                                       |                                             |                                     |    |                                          |
|------------------------|-----|-------------------------------------------------------|---------------------------------------------|-------------------------------------|----|------------------------------------------|
| Setiawan et al. (2017) | Yes | HPV vaccine                                           | Women in Asian countries                    | local AEs;<br>Systemic AEs          | 8  | random effects                           |
| Ciapponi et al. (2016) | Yes | PCV10                                                 | Children (age<5)                            | local AEs;<br>Systemic AEs;<br>SAEs | 4  | Mantel-Haenszel fixed effects            |
| Guo et al. (2016)      | Yes | Pandemic Influenza H5N1 Avian Influenza vaccine (AIV) | Adults                                      | local AEs;<br>Systemic AEs          | 5  | random effects (Mantel-Haenszel)         |
| Duan et al. (2017)     | No  | PCV in preterm infants                                | Infants                                     | local AEs;<br>Systemic AEs          | 4  | fixed effects;<br>random effects         |
| Moa et al. (2016)      | Yes | Inactivated Quadrivalent Influenza vaccine (QIV)      | Adults                                      | local AEs;<br>Systemic AEs          | 4  | random effects (inverse variance weight) |
| Huang et al. (2016)    | No  | Influenza vaccine                                     | Systemic lupus erythematosus (SLE) patients | local AEs;<br>Systemic AEs;         | 11 | random effects (inverse variance weight) |

|                               |     |                                                  |                                             |                                                                                                                     |    |                                                        |
|-------------------------------|-----|--------------------------------------------------|---------------------------------------------|---------------------------------------------------------------------------------------------------------------------|----|--------------------------------------------------------|
| Bigaeva et al. (2016)         | Yes | vaccines adjuvanted with QS-21 or ISCOMATRIX     | Non-healthy subjects                        | local AEs;<br>Systemic AEs;                                                                                         | 9  | random effects<br>(Mantel-Haenszel*)                   |
| Liao et al. (2016)            | No  | Influenza vaccine                                | Systemic lupus erythematosus (SLE) patients | All AEs                                                                                                             | 6  | fixed effects;<br>random effects<br>(Mantel-Haenszel*) |
| Stassijns et al. (2016)       | Yes | adjuvanted vaccines using AS01, AS02, AS03, MF59 | Infants;<br>Children                        | local AEs;<br>Systemic AEs;<br>SAEs;<br>unsolicited AEs;<br>AEs of special interest<br>(Convulsions;<br>Meningitis) | 26 | random effects                                         |
| Mansour-Ghanaei et al. (2016) | Yes | acellular pertussis vaccine (DTaP)               | Children                                    | All AEs                                                                                                             | 6  | random effects;<br>fixed effects                       |
| Ma et al. (2015)              | Yes | MMRV vaccine                                     | Children                                    | local AEs;<br>Systemic AEs;<br>unsolicited AEs;<br>SAEs                                                             | 13 | random effects;<br>Mantel-Haenszel<br>fixed effects    |

|                                   |     |                                                                                                           |                                    |                                                                |    |                                                                      |
|-----------------------------------|-----|-----------------------------------------------------------------------------------------------------------|------------------------------------|----------------------------------------------------------------|----|----------------------------------------------------------------------|
| Pileggi et al. (2015)             | Yes | intradermal<br>Influenza<br>vaccine                                                                       | Immuno-<br>compromised<br>patients | local AEs;<br>Systemic AEs                                     | 4  | random<br>effects (D-<br>L); Mantel-<br>Haenszel<br>fixed<br>effects |
| Polyzos et al. (2015)             | No  | Inactivated<br>Influenza<br>vaccine<br>(trivalent or<br>monovalent)                                       | Maternal<br>subjects               | congenital<br>malformations;<br>major<br>congenital<br>defects | 15 | random<br>effects (D-<br>L)                                          |
| Pileggi,<br>Mascaro et al. (2015) | Yes | intradermal<br>Influenza<br>vaccine                                                                       | Elderly<br>subjects<br>(age>=60)   | local AEs;<br>Systemic AEs                                     | 13 | random<br>effects (D-<br>L); Mantel-<br>Haenszel<br>fixed<br>effects |
| Li-Kim-Moy<br>et al. (2015)       | No  | inactivated<br>seasonal<br>Trivalent<br>Influenza<br>Vaccine (TIV)<br>administered<br>intramuscular<br>ly | Healthy<br>Children                | fever, febrile<br>convulsions;<br>SAEs                         | 15 | random<br>effects (D-<br>L)                                          |
| Leung et al. (2015)               | Yes | MMRV<br>vaccine                                                                                           | Healthy<br>Children                | local AEs;<br>Systemic AEs;                                    | 10 | random<br>effects;<br>Mantel-                                        |

|                          |     |                                                         |                                                                                             |                                                                         |    |                                           |
|--------------------------|-----|---------------------------------------------------------|---------------------------------------------------------------------------------------------|-------------------------------------------------------------------------|----|-------------------------------------------|
|                          |     |                                                         |                                                                                             | rash; febrile<br>seizure                                                |    | Haenszel<br>fixed<br>effects              |
| Wang et al.<br>(2015)    | Yes | JEV vaccines:<br>JEV-I (PHK);<br>JEV-I<br>(Vero); JEV-L | Asia-Pacific<br>area Infants;<br>Children                                                   | AEs                                                                     | 6  | random<br>effects;<br>fixed<br>effects    |
| Coelho et<br>al. (2015)  | Yes | HPV4                                                    | Children;<br>Adults (ages 9-<br>26)                                                         | local AEs;<br>Systemic AEs;                                             | 5  | Mantel-<br>Haenszel<br>(fixed<br>effects) |
| Li et al.<br>(2014)      | No  | JEV vaccine                                             | All                                                                                         | local AEs;<br>Systemic AEs;<br>AEs; Treatment-<br>emergent AEs;<br>SAEs | 7  | fixed<br>effects;<br>random<br>effects    |
| Bratton et<br>al. (2015) | No  | Influenza<br>vaccine                                    | Influenza<br>vaccination<br>during<br>pregnancy or<br>immediately<br>prior to<br>conception | spontaneous<br>abortion;<br>stillbirth                                  | 7  | random<br>effects (D-<br>L)               |
| Couto et al.<br>(2014)   | Yes | HPV                                                     | Women (age<br>>16)                                                                          | SAEs                                                                    | 14 | fixed<br>effects;<br>random<br>effects    |

|                           |     |                                                      |                      |                                                                                                                            |    |                                                               |
|---------------------------|-----|------------------------------------------------------|----------------------|----------------------------------------------------------------------------------------------------------------------------|----|---------------------------------------------------------------|
|                           |     |                                                      |                      |                                                                                                                            |    | (Mantel-Haenszel*)                                            |
| da Costa et al. (2014)    | Yes | recombinant and tetravalent dengue vaccine (CYD-TDV) | Children; Adults     | local AEs; Systemic AEs; SAEs; unsolicited AEs; unsolicited allergic reactions                                             | 7  | fixed effects; random effects                                 |
| Udell et al. (2013)       | Yes | influenza vaccine                                    | High risk population | major adverse cardiovascular events; cardiovascular mortality; all-cause mortality; other individual cardiovascular events | 6  | random effects (Mantel-Haenszel*) ; fixed effects; Yusuf-Peto |
| Ruiz-Aragon et al. (2013) | Yes | PCV13                                                | Infants              | local AEs; Systemic AEs                                                                                                    | 9  | random effects (D-L)                                          |
| Thompson et al. (2013)    | Yes | PCV13                                                | Infants; toddlers    | local AEs; Systemic AEs; SAEs; AEs                                                                                         | 13 | mixed effects model with random treatment effect.             |

|                       |     |                                            |                                      |                                     |    |                                                                       |
|-----------------------|-----|--------------------------------------------|--------------------------------------|-------------------------------------|----|-----------------------------------------------------------------------|
| Salmon et al. (2013)  | No  | influenza A (H1N1) 2009 monovalent vaccine | All                                  | GBS                                 | 6  | self-controlled risk-interval design using Poisson distribution model |
| Marra et al. (2013)   | Yes | intradermal Influenza vaccine              | Adults                               | local AEs;<br>Systemic AEs          | 13 | random effects (inverse variance weight)                              |
| Bar-On et al. (2012)  | Yes | DTP-HBV-HIB vaccine                        | Healthy infants (age <2 years)       | local AEs;<br>Systemic AEs;<br>SAEs | 18 | fixed effects;<br>random effects (Mantel-Haenszel)                    |
| Fabrizi et al. (2012) | Yes | adjuvanted HBV recombinant vaccine         | Patients with chronic kidney disease | AEs                                 | 10 | fixed effects;<br>random effects (D-L)                                |

|                       |     |                                                                                                                                                                      |                                 |                                     |    |                                                    |
|-----------------------|-----|----------------------------------------------------------------------------------------------------------------------------------------------------------------------|---------------------------------|-------------------------------------|----|----------------------------------------------------|
| Manzoli et al. (2011) | No  | Pandemic Influenza A 2009 (H1N1) Vaccines                                                                                                                            | Healthy subjects                | local AEs;<br>Systemic AEs;<br>SAEs | 34 | random effects;<br>Mantel-Haenszel (fixed effects) |
| Beyer et al. (2011)   | Yes | inactivated influenza vaccines: split virus vaccine (SPL); aqueous subunit vaccine (SU); virosomal subunit vaccine (VIR); or MF59-adjuvanted subunit vaccine (adjSU) | Primed populations              | local AEs;<br>Systemic AEs;         | 13 | random effects (D-L)                               |
| Lu et al. (2011)      | Yes | L1 VLP-based HPV vaccines                                                                                                                                            | Non-pregnant women (ages 15-44) | SAEs; injection-related SAEs        | 7  | fixed effects                                      |
| Manzoli et al. (2009) | Yes | avian influenza A H5N1 vaccine                                                                                                                                       | Healthy adults who had not been | local AEs;<br>Systemic AEs;         | 13 | random effects;<br>Mantel-                         |

|                           |     |                                   |                               |                                                      |    |                                              |
|---------------------------|-----|-----------------------------------|-------------------------------|------------------------------------------------------|----|----------------------------------------------|
|                           |     |                                   | previously vaccinated with H5 |                                                      |    | Haenszel (fixed effects)                     |
| Beyer et al. (1998)       | Yes | Influenza Subunit (SU) Vaccines   | All                           | local AEs;<br>Systemic AEs;                          | 13 | random effects (D-L)                         |
| Fraser et al. (2007)      | Yes | Typhoid fever vaccines            | Children;<br>Adults           | local AEs;<br>Systemic AEs;                          | 7  | random effects                               |
| Rambout et al. (2007)     | Yes | HPV vaccine                       | Women (ages 15-26)            | SAEs; death                                          | 6  | Peto OR fixed effects                        |
| Kretzschmar et al. (2006) | No  | smallpox vaccine                  | All                           | postvaccinal encephalitis; death                     | 12 | Bayesian methods                             |
| Durier et al. (2006)      | No  | HIV lipopeptides vaccines         | Adults                        | local AEs;<br>Systemic AEs;<br>SAEs                  | 8  | IPD logistic regression adjusted for factors |
| Jefferson et al. (2004)   | No  | aluminium-containing DTP vaccines | Children (age $\leq 16$ )     | local AEs;<br>Systemic AEs;                          | 3  | fixed effects;<br>random effects             |
| Engels et al. (1998)      | No  | Typhoid fever vaccines            | All                           | local AEs;<br>Systemic AEs;<br>Missed school or work | 10 | random effects                               |



|                         |    |                         |                                |                          |    |                                                                         |
|-------------------------|----|-------------------------|--------------------------------|--------------------------|----|-------------------------------------------------------------------------|
| Jefferson et al. (2003) | No | pertusis or DTP vaccine | Healthy individuals (age <=15) | local AEs; Systemic AEs; | 11 | Mantel-Haenszel; random effects; fixed effects; Peto OR for rare events |
|-------------------------|----|-------------------------|--------------------------------|--------------------------|----|-------------------------------------------------------------------------|

\*Random effects (Mantel-Haenszel) refers to the random effects method based on the Mantel-Haenszel method implemented in the RevMan software by the Cochrane Collaboration.

Abbreviations: AE – Adverse Event; COPD - Chronic Obstructive Pulmonary Disease; DTP - diphtheria, pertussis, tetanus; GBS - Guillain-Barré syndrome; HBV – Hepatitis B Virus; HIB - Haemophilus influenzae type B; HIV - Human Immunodeficiency Virus; HPV – Human Papillomavirus; IPD – Individual Participant Data; JEV - Japanese encephalitis vaccine; MMRV - measles, mumps, rubella, varicella; NTHi - Nontypeable Haemophilus influenzae; OR – Odds Ratio; PCV - pneumococcal conjugate vaccine; pIMD - Potentially Immune Mediated Disease; RCT – Randomized Controlled Trial; SAE – Serious Adverse Events;

### S3. References of the included studies

1. Arbyn, M., and Xu, L. (2018), "Efficacy and Safety of Prophylactic HPV Vaccines. A Cochrane Review of Randomized Trials," *Expert Review of Vaccines*, 17, 1085-1091.
2. Baay, M., Bollaerts, K., and Verstraeten, T. (2018), "A Systematic Review and Meta-Analysis on the Safety of Newly Adjuvanted Vaccines among Older Adults," *Vaccine*, 36, 4207-4214.
3. Badawi, A., Shering, M., Rahman, S., and Lindsay, L. R. (2017), "A Systematic Review and Meta-Analysis for the Adverse Effects, Immunogenicity and Efficacy of Lyme Disease Vaccines: Guiding Novel Vaccine Development," *Canadian Journal of Public Health*, 108, e62-e70.
4. Badurdeen, S., Marshall, A., Daish, H., Hatherill, M., and Berkley, J. A (2019), "Safety and Immunogenicity of Early Bacillus Calmette-Guérin Vaccination in Infants who are Preterm and/or Have Low Birth Weights: A Systematic Review and Meta-analysis," *Journal of the American Medical Association Pediatrics*, 173, 75–85.
5. Bar-On, E. S., Goldberg, E., Hellmann, S., and Leibovici, L. (2012), "Combined DTP-HBV-HIB Vaccine versus Separately Administered DTP-HBV and HIB Vaccines for Primary Prevention of Diphtheria, Tetanus, Pertussis, Hepatitis B and Haemophilus Influenzae B (HIB)," *Cochrane Database of Systematic Reviews*, 4, CD005530.
6. Beyer, W. E., Palache, A. M., and Osterhaus, A. D. (1998), "Comparison of Serology and Reactogenicity between Influenza Subunit Vaccines and Whole Virus or Split Vaccines: A Review and Meta-Analysis of the Literature," *Clinical Drug Investigation*, 15, 1-12.
7. Beyer, W. E., Nauta, J. J., Palache, A. M., Giezenan, K. M., Osterhaus, A. D. (2011), "Immunogenicity and Safety of Inactivated Influenza Vaccines in Primed Populations: A Systematic Literature Review and Meta-analysis," *Vaccine*, 29, 5785-5792.
8. Bigaeva, E., Doorn, E. V., Liu, H., and Hak, E. (2016), "Meta-Analysis on Randomized Controlled Trials of Vaccines with QS-21 or ISCOMATRIX Adjuvant: Safety and Tolerability," *PLoS One*, 11, e0154757.
9. Bratton, K. N., Wardle, M.T., Orenstein, W. A., and Omer, S. B. (2015), "Maternal Influenza Immunization and Birth Outcomes of Stillbirth and Spontaneous Abortion: A Systematic Review and Meta-analysis," *Clinical Infectious Diseases*, 60, e11-e19.
10. Ciapponi, A., Lee, A., Bardach, A., Glujovsky, D., Rey-Ares, L., Cafferata, M. L., Valanzasca, P., and Martí, S. G. (2016), "Interchangeability between Pneumococcal Conjugate Vaccines: A Systematic Review and Meta-Analysis," *Value in Health Regional Issues*, 11, 24-34.
11. Coelho PL, da Silva Calestini GL, Alvo FS, de Moura Freitas JM, Castro PM, Konstantyner T. Safety of human papillomavirus 6, 11, 16 and 18

- (recombinant): systematic review and meta-analysis. *Rev Paul Pediatr.* 2015, 33(4), 474-82.
12. Costa, A. P. F., Cobucci, R. N.O., da Silva, J. M., da Costa Lima, P. H., Giraldo, P.C., and Gonçalves, A. K. (2017), "Safety of Human Papillomavirus 9-Valent Vaccine: A Meta-Analysis of Randomized Trials," *Journal of Immunology Research*, 2017, Article ID 3736201.
  13. Couto, E., Sæterdal, I., Juvet, L. K., and Klemp, M. (2014), "HPV Catch-up Vaccination of Young Women: A Systematic Review and Meta-Analysis," *BMC Public Health*, 14, 867.
  14. da Costa, V. G., Marques-Silva, A. C., Floriano, V. G., and Moreli, M. L. (2014), "Safety, Immunogenicity and Efficacy of a Recombinant Tetravalent Dengue Vaccine: A Meta-analysis of Randomized Trials," *Vaccine*, 32, 4885-4892.
  15. Duan, K., Guo, J., and Lei, P. (2017), "Safety and Immunogenicity of Pneumococcal Conjugate Vaccine in Preterm Infants: A Meta-Analysis," *Indian journal of Pediatrics*, 84, 101–110.
  16. Durier, C., Launay, O., Meiffredy, V., Saïdi, Y., Salmon, D., Lévy, Y., Guillet, J. G., Pialoux, G., and Aboulker, J. P. (2006), "Clinical Safety of HIV Lipopeptides Used as Vaccines in Healthy Volunteers and HIV-infected Adults," *AIDS*, 20, 1039-1049.
  17. Engels, E. A., Falagas, M. E., Lau, J., and Bennish, M. L. (1998), "Typhoid Fever Vaccines: A Meta-analysis of Studies on Efficacy and Toxicity," *BMJ*, 316, 110-116.
  18. Fabrizi, F., Dixit, V., Messa, P., and Martin, P. (2012), "Hepatitis B Virus Vaccine in Chronic Kidney Disease: Improved Immunogenicity by Adjuvants? A Meta-analysis of Randomized Trials," *Vaccine*, 30, 2295-2300.
  19. Flacco, M. E., Manzoli, L., Rosso, A., Marzuillo, C., Bergamini, M., Stefanati, A., Cultrera, R., Villari, P., Ricciardi, W., Ioannidis, J. P. A., and Contopoulos-Ioannidis, D. G. (2018), "Immunogenicity and Safety of the Multicomponent Meningococcal B Vaccine (4CMenB) in Children and Adolescents: A Systematic Review and Meta-analysis," *Lancet Infectious Diseases*, 18, 461-472.
  20. Fraser, A., Paul, M., Goldberg, E., Acosta, C. J., and Leibovici, L. (2007), "Typhoid Fever Vaccines: Systematic Review and Meta-analysis of Randomized Controlled Trials," *Vaccine*, 25, 7848-7857.
  21. Genovese, C., LA Fauci, V., Squeri, A., Trimarchi, G., and Squeri, R. (2018), "HPV Vaccine and Autoimmune Diseases: Systematic Review and Meta-analysis of the Literature," *Journal of Preventive Medicine and Hygiene*, 59, E194-E199.
  22. Godói, I. P., Lemos, L. L., de Araújo, V. E., Bonoto, B. C., Godman, B., and Guerra Júnior A. A. (2017), "CYD-TDV Dengue Vaccine: Systematic Review and Meta-Analysis of Efficacy, Immunogenicity and Safety," *Journal of Comparative Effectiveness Research*, 6, 165-180.

23. Guo, Q., Liu, Z., Gao, J., Zhou, J., Hu, W., Cun, Y., Li, W., and Liao, G. (2016), Immunogenicity and Safety of Pandemic Influenza H5N1 Vaccines in Healthy Adults Through Meta-Analysis,” *Cellular Physiology and Biochemistry*, 40, 921-932.
24. Huang, Y., Wang, H., Wan, L., Lu, X., Tam, W. W. (2016), “Is Systemic Lupus Erythematosus Associated with a Declined Immunogenicity and Poor Safety of Influenza Vaccination?: A Systematic Review and Meta-Analysis,” *Medicine*, 95, e3637.
25. Jefferson, T., Rudin, M., and Di Pietrantonj, C. (2003), “Systematic Review of the Effects of Pertussis Vaccines in Children,” *Vaccine*, 21, 2003-2014.
26. Jefferson, T., Rudin, M., and Di Pietrantonj, C. (2004), “Adverse Events After Immunisation with Aluminium-Containing DTP Vaccines: Systematic Review of the Evidence,” *Lancet Infectious Diseases*, 4, 84-90.
27. Kretzschmar, M., Wallinga, J., Teunis, P., Xing, S., and Mikolajczyk, R. (2006), “Frequency of Adverse Events After Vaccination with Different Vaccinia Strains,” *PLoS Medicine*, 3, e272. (Erratum in: PLoS Med. 2006, 3, e429).
28. Leung, J. H., Hirai, H. W., and Tsoi, K. K. (2015), “Immunogenicity and Reactogenicity of Tetravalent Vaccine for Measles, Mumps, Rubella and Varicella (MMRV) in Healthy Children: A Meta-analysis of Randomized Controlled Trials,” *Expert Review of Vaccines*, 14, 1149-1157.
29. Li, X., Ma, S. J., Liu, X., Jiang, L. N., Zhou, J. H., Xiong, Y., Ding, H., and Chen, Q. (2014). “Immunogenicity and Safety of Currently Available Japanese Encephalitis Vaccines: A Systematic Review,” *Human Vaccines & Immunotherapeutics*, 10, 3579-3593.
30. Liao, Z., Tang, H., Xu, X., Liang, Y., Xiong, Y., and Ni, J. (2016), “Immunogenicity and Safety of Influenza Vaccination in Systemic Lupus Erythematosus Patients Compared with Healthy Controls: A Meta-Analysis,” *PLoS One*, 11, e0147856.
31. Li-Kim-Moy, J., Yin, J. K., Rashid, H., Khandaker, G., King, C., Wood, N., Macartney, K. K., Jones, C., and Booy, R. (2015), “Systematic Review of Fever, Febrile Convulsions and Serious Adverse Events Following Administration of Inactivated Trivalent Influenza Vaccines in Children,” *Euro Surveillance*, 20, 21159.
32. Lu, B., Kumar, A., Castellsagué, X., and Giuliano, A. R. (2011), “Efficacy and Safety of Prophylactic Vaccines Against Cervical HPV Infection and Diseases Among Women: A Systematic Review & Meta-analysis,” *BMC Infectious Diseases*, 11:13.
33. Ma, S. J., Li, X., Xiong, Y. Q., Yao, A. L., and Chen, Q. (2015), “Combination Measles-Mumps-Rubella-Varicella Vaccine in Healthy Children: A Systematic Review and Meta-analysis of Immunogenicity and Safety,” *Medicine*, 94, e1721.
34. Malisheni, M., Khaiboullina, S. F., Rizvanov, A. A., Takah, N., Murewanhema, G., and Bates, M. (2017), “Clinical Efficacy, Safety, and Immunogenicity of a

- Live Attenuated Tetravalent Dengue Vaccine (CYD-TDV) in Children: A Systematic Review with Meta-analysis,” *Frontiers in Immunology*, 8, 863.
35. Mansour-Ghanaei, R., Moradi-Lakeh, M., Shakerian, S., Karimi, A., Esmaeeli, S., Shokrane, F., Mahmoudi, S., and Yaghoubi, M. (2016), “Acellular Pertussis Vaccine Efficacy: An Updated Systematic Review and Meta-analysis,” *Medical Journal of the Islamic Republic of Iran*, 30, 451.
  36. Manzoli, L., Salanti, G., De Vito, C., Boccia, A., Ioannidis, J. P., and Villari, P. (2009), “Immunogenicity and Adverse Events of Avian Influenza A H5N1 Vaccine in Healthy Adults: Multiple-treatments Meta-analysis,” *Lancet Infectious Diseases*, 9, 482-492.
  37. Manzoli, L., De Vito, C., Salanti, G., D'Addario, M., Villari, P., and Ioannidis, J. P. (2011), “Meta-analysis of the Immunogenicity and Tolerability of Pandemic Influenza A 2009 (H1N1) Vaccines,” *PLoS One*, 6, e24384.
  38. Marra, F., Young, F., Richardson, K., and Marra, C. A. (2013), “A meta-analysis of Intradermal Versus Intramuscular Influenza Vaccines: Immunogenicity and Adverse Events. *Influenza and Other Respiratory Viruses*, 7, 584-603.
  39. Moa, A. M., Chughtai, A. A., Muscatello, D. J., Turner, R. M., and MacIntyre, C. R. (2016), “Immunogenicity and Safety of Inactivated Quadrivalent Influenza Vaccine in Adults: A Systematic Review and Meta-analysis of Randomized Controlled Trials,” *Vaccine*, 34, 4092-4102.
  40. Mouchet, J., Salvo, F., Raschi, E., Poluzzi, E., Antonazzo, I. C., De Ponti, F., and Bégaud, B. (2018), “Human Papillomavirus Vaccine and Demyelinating Diseases-A systematic Review and Meta-analysis,” *Pharmacological Research*, 132, 108-118.
  41. Mulley, W. R., Dendle, C., Ling, J. E. H., and Knight, S. R. (2018), “Does Vaccination in Solid-organ Transplant Recipients Result in Adverse Immunologic Sequelae? A Systematic Review and Meta-analysis,” *Journal of Heart and Lung Transplantation*, 37, 844-852.
  42. Ogawa, Y., Takei, H., Ogawa, R., and Mihara, K. (2017), “Safety of Human Papillomavirus Vaccines in Healthy Young Women: A Meta-analysis of 24 Controlled Studies,” *Journal of Pharmaceutical Health Care and Sciences*, 3, 18.
  43. Pileggi, C., Lotito, F., Bianco, A., Nobile, C. G., and Pavia, M. (2015), “Immunogenicity and Safety of Intradermal Influenza Vaccine in Immunocompromised Patients: A Meta-analysis of Randomized Controlled Trials,” *BMC Infectious Diseases*, 15, 427.
  44. Pileggi, C., Mascaro, V., Bianco, A., Nobile, C. G., and Pavia, M. (2015), “Immunogenicity and Safety of Intradermal Influenza Vaccine in the Elderly: A Meta-Analysis of Randomized Controlled Trials,” *Drugs & Aging*, 32, 857-869.
  45. Polyzos, K. A., Konstantelias, A. A., Pitsa, C. E., and Falagas, M. E. (2015), “Maternal Influenza Vaccination and Risk for Congenital Malformations: A Systematic Review and Meta-analysis,” *Obstetrics & Gynecology*, 126, 1075-1084.

46. Rambout, L., Hopkins, L., Hutton B, and Fergusson, D. (2007), "Prophylactic Vaccination Against Human Papillomavirus Infection and Disease in Women: A Systematic Review of Randomized Controlled Trials," *CMAJ*, 177, 469-479.
47. Ruiz-Aragón, J., Márquez Peláez, S., Molina-Linde, J. M, and Grande-Tejada, A. M. (2013), "Safety and Immunogenicity of 13-valent Pneumococcal Conjugate Vaccine in Infants: A Meta-analysis," *Vaccine*, 31, 5349-5358.
48. Salmon, D. A, Proschan, M., Forshee, R., Gargiullo, P., Bleser, W., Burwen, D. R., Cunningham, F., Garman, P., Greene, S. K., Lee, G. M., Vellozzi, C., Yih, W.K., Gellin, B., Lurie, N. and H1N1 GBS Meta-Analysis Working Group. (2013), "Association Between Guillain-Barré Syndrome and Influenza A (H1N1) 2009 Monovalent Inactivated Vaccines in the USA: A Meta-analysis," *Lancet*, 381, 1461-1468.
49. Setiawan, D., Luttjeboer, J., Pouwels, K. B., Wilschut, J. C., and Postma, M. J. (2017), "Immunogenicity and Safety of Human Papillomavirus (HPV) Vaccination in Asian Populations from six Countries: A Meta-analysis," *Japanese Journal of Clinical Oncology*, 47, 265-276.
50. Stassijns, J., Bollaerts, K., Baay, M., and Verstraeten, T. (2016), "A systematic Review and Meta-analysis on the Safety of Newly Adjuvanted Vaccines Among Children," *Vaccine*, 34, 714-722.
51. Teo, E., Lockhart, K., Purchuri, S. N., Pushparajah, J., Cripps, A. W., and van Driel, M. L. (2017), "Haemophilus Influenzae Oral Vaccination for Preventing Acute Exacerbations of Chronic Bronchitis and Chronic Obstructive Pulmonary Disease," *Cochrane Database of Systematic Reviews*, 6, CD010010.
52. Thompson, A., Gurtman, A., Patterson, S., Juergens, C., Laudat, F., Emini, E. A., Gruber, W. C., and Scott, D. A. (2013), "Safety of 13-valent Pneumococcal Conjugate Vaccine in Infants and Children: Meta-analysis of 13 clinical trials in 9 Countries," *Vaccine*, 31, 5289-5295.
53. Tricco, A. C, Zarin, W., Cardoso, R., Cardoso, R., Veroniki, A., Khan, P. A., Nincic, V., Ghassemi, M., Warren, R., Sharpe, J. P., Page, A. V., and Straus, S. (2018), "Efficacy, Effectiveness, and Safety of Herpes Zoster Vaccines in Adults Aged 50 and Older: Systematic Review and Network Meta-analysis," *BMJ*, 363, k4029.
54. Udell, J. A., Zawi, R., Bhatt, D. L., Keshtkar-Jahromi, M., Gaughran, F., Phrommintikul, A., Ciszewski, A., Vakili, H., Hoffman, E. B., Farkouh, M. E., and Cannon, C. P. (2013), "Association Between Influenza Vaccination and Cardiovascular Outcomes in High-risk Patients: A Meta-analysis," *JAMA*, 310, 1711-1720.
55. Vadlamudi, N. K., Parhar, K., Altre Malana, K. L., Kang, A., and Marra, F. (2019), "Immunogenicity and Safety of the 13-valent Pneumococcal Conjugate Vaccine Compared to 23-valent Pneumococcal Polysaccharide in Immunocompetent Adults: A Systematic Review and Meta-analysis," *Vaccine*, 37, 1021-1029.

56. Velázquez, R. F., Linhares, A. C., Muñoz, S., Seron, P., Lorca, P., DeAntonio, R., and Ortega-Barria, E. (2017), "Efficacy, Safety and Effectiveness of Licensed Rotavirus Vaccines: A Systematic Review and Meta-analysis for Latin America and the Caribbean," *BMC Pediatrics*, 17, 14.
57. Wang, S. Y., Cheng, X. H., Li, J. X., Li, X. Y., Zhu, F. C., and Liu, P. (2015), "Comparing the Immunogenicity and Safety of 3 Japanese Encephalitis Vaccines in Asia-Pacific Area: A Systematic Review and Meta-analysis," *Human Vaccines & Immunotherapeutics*, 11, 1418-1425.
58. Xu, X., Zhu, H., and Lv, H. (2018), "Safety of Staphylococcus Aureus Four-antigen and Three-antigen Vaccines in Healthy Adults: A Meta-analysis of Randomized Controlled Trials," *Human Vaccines & Immunotherapeutics*, 14, 314-321.
59. Yin, M., Xu, X., Liang, Y., and Ni, J. (2018), "Effectiveness, Immunogenicity and Safety of One vs. Two-dose Varicella Vaccination a Meta-analysis," *Expert Review of Vaccines*, 17, 351-362.
60. Zhao, H., Bao, F. F., and Liu, A. (2017), "Safety, Immunogenicity, and Efficacy of Borrelia Burgdorferi Outer Surface Protein A (OspA) vaccine: A Meta-analysis," *Journal Infection in Developing Countries*, 11, 1-9.
61. Zheng, D., Gao, F., Zhao, C., Ding, Y., Cao, Y., Yang, T., Xu, X., and Chen, Z. (2019), "Comparative Effectiveness of H7N9 Vaccines in Healthy Individuals," *Human Vaccines & Immunotherapeutics*, 15, 80-90.
